# Supplementary material for: Rapid and Stable Formation Method of Human Astrocyte Spheroid in a High Viscous Methylcellulose Medium and Its Functional Advantages
Source: MDPI journal article supplement (doi:10.3390/bioengineering10030349), 2023-03-11
Supplement: s1 [file s1]

**Table S1.** Primers used in real-time PCR analysis.

| Primer name <sup>a</sup> | Sequence (5' > 3')                 |
|--------------------------|------------------------------------|
| GAPDH F                  | TGC ACC ACC AAC TGC TTA            |
| GAPDH R                  | GGA TGC AGG GAT GAT GTT C          |
| GS F                     | AAG AGC GGA GCG TGT GAG            |
| GS R                     | TCA TGG TGG AAG GTG TTC TG         |
| EAAT2 F                  | TCT CCC CAG TAC CTC TCC AG         |
| EAAT2 R                  | TGG GCA TAT TGT TGG CAC T          |
| GFAP F                   | ACA GGA AGC TGC TAG AGG GCG A      |
| GFAP R                   | CCA GGC TGG TTT CTC GAA TCT G      |
| ALDH1L1 F                | ATC ACC CGT CAC TGC TCC CTA        |
| ALDH1L1 R                | CCC CCC TTT CTT ATC TCC GTG        |
| PTGS2 F                  | CTT CAC GCA TCA GTT TTT CAA G      |
| PTGS2 R                  | TCA CCG TAA ATA TGA TTT AAG TCC AC |
| CCL5 F                   | TGC CCA CAT CAA GGA GTA TTT        |
| CCL5 R                   | CTT TCG GGT GAC AAA GAC G          |
| CXCL8 F                  | GAG CAC TCC ATA AGG CAC AAA        |
| CXCL8 R                  | ATG GTT CCT TCC GGT GGT            |
| LCN2 F                   | CTC CAC CTC AGA CCT GAT CC         |
| LCN2 R                   | ACA TAC CAC TTC CCC TGG AAT        |

<sup>a</sup>, F and R indicate forward and reverse direction.
